# Supplementary material for: Achiral single molecule magnet and chiral single chain magnet
Source: Royal Society of Chemistry journal article supplement (doi:10.1039/c0cc00184h), 2010-01-01
Supplement: c0cc00184h.pdf [file c0cc00184h.pdf]

**Supplementary materials**

**Achiral Single Molecule Magnet and Chiral Single Chain Magnet**

**N. Hoshino, Y. Sekine, M. Nihei, and H. Oshio\***

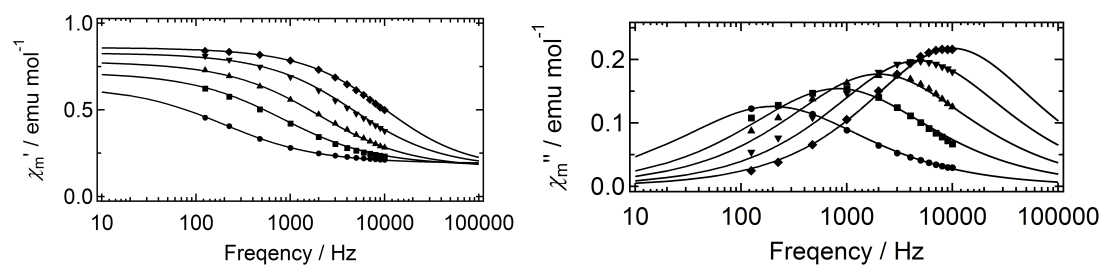

Frequency-dependent ac susceptibilities

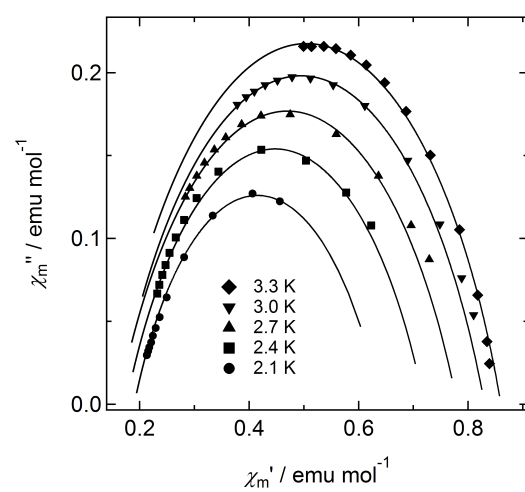

Cole-Cole plots

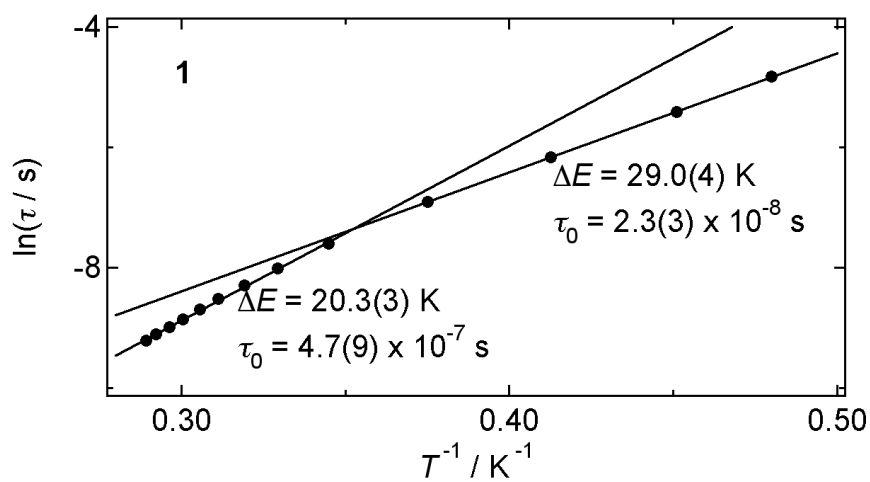

Arrhenius plot

Figure S1. Frequency-dependent ac susceptibilities, Cole-Cole plots, and Arrhenius plot for **1**.

Table S1. Fitting Parameters for  $\chi'$  and  $\chi''$  data of **1**

| $T / \text{K}$                          | 2.1   | 2.4    | 2.7    | 3.0     | 3.3    |
|-----------------------------------------|-------|--------|--------|---------|--------|
| $\chi_{\text{S}} / \text{emu mol}^{-1}$ | 0.19  | 0.175  | 0.16   | 0.16    | 0.15   |
| $\chi_{\text{T}} / \text{emu mol}^{-1}$ | 0.64  | 0.72   | 0.78   | 0.83    | 0.86   |
| $\alpha$                                | 0.35  | 0.345  | 0.34   | 0.32    | 0.3    |
| $\tau / \text{s}$                       | 0.005 | 0.0012 | 0.0005 | 0.00021 | 0.0001 |

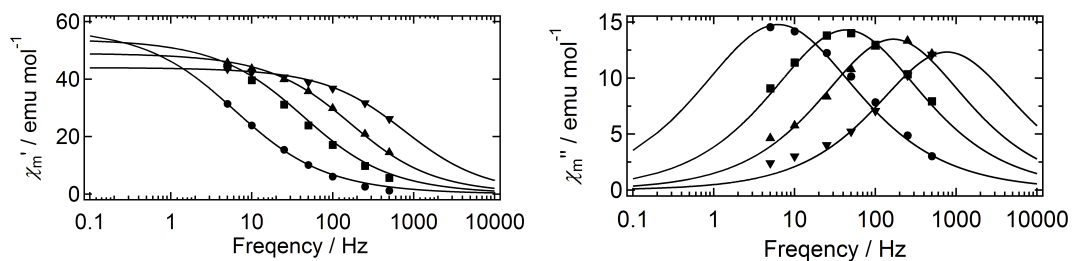

Frequency-dependent ac susceptibilities

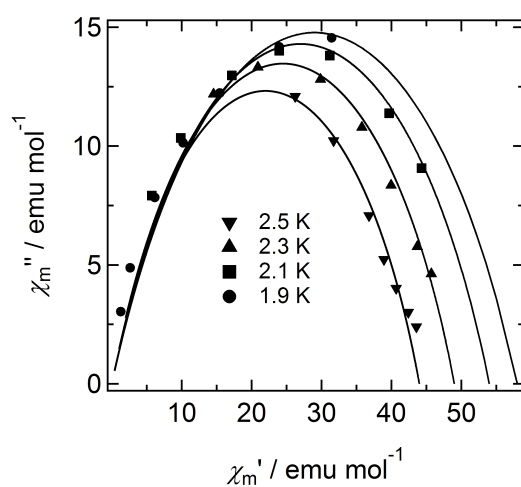

Cole-Cole plots

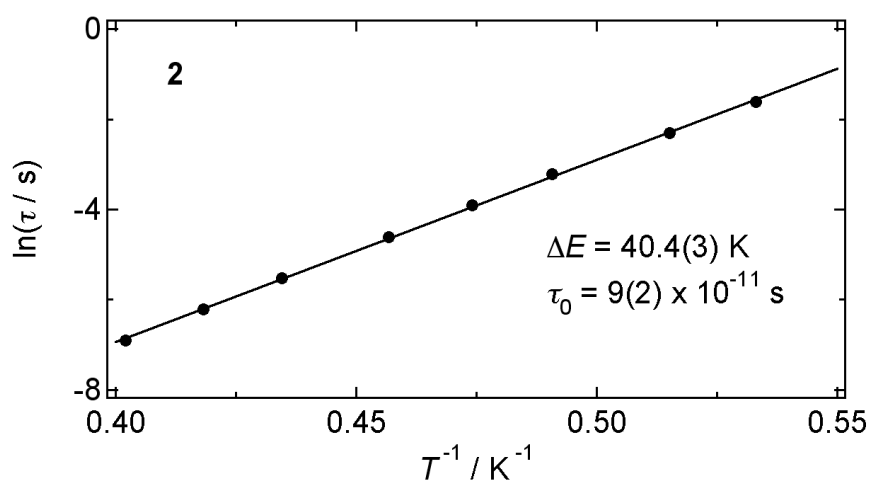

Arrhenius plot

Figure S2. Frequency-dependent ac susceptibilities, Cole-Cole plots, and Arrhenius plot for **2**.

Table S2. Fitting parameters for  $\chi'$  and  $\chi''$  data of **2**

| $T / \text{K}$                          | 1.9  | 2.1   | 2.3   | 2.5    |
|-----------------------------------------|------|-------|-------|--------|
| $\chi_{\text{S}} / \text{emu mol}^{-1}$ | 0    | 0     | 0     | 0      |
| $\chi_{\text{T}} / \text{emu mol}^{-1}$ | 58   | 54    | 48    | 43     |
| $\alpha$                                | 0.42 | 0.38  | 0.35  | 0.31   |
| $\tau / \text{s}$                       | 0.16 | 0.023 | 0.005 | 0.0011 |
